# Supplementary material for: Psychiatrists’ Engagement in Research as a Pathway towards the Expansion of Distributed Medical Education (DME): A Regional Analysis across Two Provinces in Atlantic Canada
Source: MDPI journal article supplement (doi:10.3390/ime3010006), 2024-03-06
Supplement: s1 [file s1]

# DMNB/DMNS Environmental Scan

[Add introduction]

## DEMOGRAPHICS

**Q1: Which province do you work in?**

- ☐ New Brunswick
- ☐ Nova Scotia

*Note: if you have NOT answered/chosen item [1] in question 1, skip the following question*

**Q2: Which Horizon Health Zone do you work in?**

- ☐ Health Zone 1: Moncton/South-East Area
- ☐ Health Zone 2: Fundy Shore and Saint John Area
- ☐ Health Zone 3: Fredericton and River Valley Area
- ☐ Health Zone 7: Miramichi Area

*Note: if you have NOT answered/chosen item [2] in question 1, skip the following question*

**Q3: Which Nova Scotia Health Zone do you work in?**

- ☐ Central Zone (Non-AFP Psychiatrists)
- ☐ Eastern Zone
- ☐ Northern Zone
- ☐ Western Zone

*Note: if you have NOT answered/chosen item [2] in question 3, skip the following question*

**Q4: Which Eastern Zone site do you work at?**

- ☐ Sydney
- ☐ Antigonish

*Note: if you have NOT answered/chosen item [3] in question 3, skip the following question*

**Q5: Which Northern Zone site do you work at?**

- ☐ New Glasgow
- ☐ Truro

*Note: if you have NOT answered/chosen item [4] in question 3, skip the following question*

**Q6: Which Western Zone site do you work at?**

- ☐ Bridgewater
- ☐ Kentville
- ☐ Yarmouth

**Q7: Which type of medical graduate are you?**

- ☐ Canadian Medical Graduate
- ☐ International Medical Graduate

**Q8: Which type of specialist training did you complete?**

- ☐ Canadian Specialist training
- ☐ International Specialist training

**Q9: Do you currently have an academic appointment with the Department of Psychiatry at Dalhousie University?**

- ☐ Yes
- ☐ No

*Note: if you have NOT answered/chosen item [1] in question 9, skip the following question*

**Q10: What is your academic rank?**

- ☐ Clinical Lecturer
- ☐ Assistant Professor
- ☐ Associate Professor
- ☐ Professor
- ☐ Unsure

*Note: if you have NOT answered/chosen item [1] in question 9, skip the following question*

**Q11: Would you be interested in eventually applying for promotion to a higher academic rank?**

- ☐ Not at all interested      ☐ Slightly interested      ☐ Moderately interested      ☐ Quite interested  
☐ Extremely interested

*Note: if you have NOT answered/chosen item [2] in question 9, skip the following question*

**Q12: Would you like an academic appointment with the Department of Psychiatry at Dalhousie University?**

- ☐ Definitely Not      ☐ Probably Not      ☐ Possibly      ☐ Probably      ☐ Definitely

**Q13: What gender do you identify as?**

- ☐ Man  
☐ Woman  
☐ Prefer not to say  
☐ Prefer to self-describe:

If you have chosen "other", please specify:

## MENTAL HEALTH SERVICES AND SCOPE OF PRACTICE

**Q14: Which of the following mental health services do you work in? (Select all that apply)**

- ☐ Addiction Services  
☐ Consultation Liaison Psychiatry Services  
☐ Psychiatry Emergency Services  
☐ Psychiatry Inpatient Services  
☐ Psychiatry Outpatient Services  
☐ Specialty Services  
☐ Other, please specify:

If you have chosen "other", please specify:

**Q15: What is your primary specialization or scope of practice?**

- ☐ Addiction Psychiatry
- ☐ Consultation Liaison Psychiatry
- ☐ Child and Adolescent Psychiatry
- ☐ Emergency Psychiatry
- ☐ General Adult Psychiatry
- ☐ Geriatric Psychiatry
- ☐ Other, please specify:

If you have chosen "other", please specify:

**Q16: What is your secondary specialization or scope of practice?**

- ☐ I do not have a secondary specialization
- ☐ Addiction Psychiatry
- ☐ Consultation Liaison Psychiatry
- ☐ Child and Adolescent Psychiatry
- ☐ Emergency Psychiatry
- ☐ General Adult Psychiatry
- ☐ Geriatric Psychiatry
- ☐ Other, please specify:

If you have chosen "other", please specify:

**Q17: Do you practice psychotherapy?**

- ☐ Yes
- ☐ No

*Note: if you have NOT answered/chosen item [1] in question 17, skip the following question*

**Q18: Would you be able to supervise a resident for a longitudinal psychotherapy case?**

- ☐ Yes
- ☐ No

*Note: if you have NOT answered/chosen item [1] in question 17, skip the following question*

**Q19: What modalities of psychotherapy do you employ? (Select all that apply)**

- ☐ Cognitive Behavioral Therapy
- ☐ Dialectic Behavioural Therapy
- ☐ Family Therapy
- ☐ Group Therapy
- ☐ Interpersonal Therapy
- ☐ Psychodynamic Psychotherapy
- ☐ Other, please specify:

If you have chosen "other", please specify:

**Q20: What is the primary mode of payment for the psychiatric services you deliver?**

- ☐ Alternate Funding Plan
- ☐ Fee for service
- ☐ Salary with benefits (e.g. pension)
- ☐ Sessional fees
- ☐ Other, please specify:

If you have chosen "other", please specify:

**Q21: What is the secondary mode of payment for the psychiatric services you deliver?**

- ☐ There is no secondary mode of payment
- ☐ Alternate Funding Plan
- ☐ Fee for service
- ☐ Salary with benefits (e.g. pension)
- ☐ Sessional fees
- ☐ Other, please specify:

If you have chosen "other", please specify:

## MEDICAL EDUCATION

**Q22: Have you received any formal training in medical education?**

- ☐ Yes  
☐ No

*Note: if you have NOT answered/chosen item [1] in question 22, skip the following question*

**Q23: What is the highest level of medical education qualification you have received?**

- ☐ Certificate  
☐ Diploma  
☐ Bachelors degree  
☐ Graduate diploma  
☐ Masters degree  
☐ PhD  
☐ Other, please specify:

If you have chosen "other", please specify:

**Q24: What areas of medical education do you have knowledge and/or skills in? (Select all that apply)**

- ☐ I do not have knowledge and/or skills in medical education  
☐ Curriculum development (e.g. developing courses/modules, writing objectives)  
☐ Curriculum delivery (e.g. virtual teaching, small group teaching, simulation-based teaching)  
☐ Assessment (e.g. writing exam questions, writing OSCE cases)  
☐ Program evaluation  
☐ Other, please specify:

If you have chosen "other", please specify:

**Q25: What areas of medical education would you like to participate in? (Select all that apply)**

- ☐ I would not like to participate in medical education activities  
☐ Curriculum development (e.g. developing courses/modules, writing objectives)  
☐ Curriculum delivery (e.g. virtual teaching, small group teaching, simulation-based teaching)  
☐ Assessment (e.g. writing exam questions, writing OSCE cases)

- ☐ Program evaluation
- ☐ Other, please specify:

If you have chosen "other", please specify:

**Q26: What clinical training and supervision of learners do you currently participate in? (Select all that apply)**

- ☐ I do not participate in clinical training or supervision of learners
- ☐ Medical Students
- ☐ Psychiatry Residents
- ☐ Family Medicine Residents
- ☐ Allied Mental Health Professionals
- ☐ Canadian Fellows
- ☐ International Fellows
- ☐ Other, please specify:

If you have chosen "other", please specify:

**Q27: How many years of experience do you have providing clinical training or supervision to medical learners?**

- ☐ 0 years
- ☐ 1-2 years
- ☐ 3-5 years
- ☐ 6-10 years
- ☐ More than 10 years

**Q28: Are you familiar with the Royal College of Physicians and Surgeons of Canada Competency by Design for residency training?**

- ☐ Yes
- ☐ No

**Q29: Would you be available to participate in formal training in the Royal College of Physicians and Surgeons of Canada Competency by Design to facilitate your involvement in psychiatry residency training?**

- ☐ Yes  
☐ No

**Q30: Would you consider the infrastructure and team set up of your service to be adequate for psychiatry resident training? (Requirements include office space for residents and interview rooms that comply with Royal College accreditation safety standards.)**

- ☐ Not at all adequate      ☐ Slightly adequate      ☐ Moderately adequate      ☐ Quite adequate  
☐ Extremely adequate

**Q31: Would you like to start or continue participating in clinical training and supervision of psychiatry residents?**

- ☐ Definitely Not      ☐ Probably Not      ☐ Possibly      ☐ Probably      ☐ Definitely

**Q32: What would you consider an appropriate length of placement for a psychiatry resident on rotation with your team?**

- ☐ One to two months  
☐ Two to four months  
☐ Four to six months  
☐ Other, please specify:

If you have chosen "other", please specify:

**Q33: Would you like to start or continue participating in the provision of lectures or skills-based teaching for psychiatry residents?**

- ☐ Definitely Not      ☐ Probably Not      ☐ Possibly      ☐ Probably      ☐ Definitely

**Q34: Would you like to start or continue participating in skills-based examinations of psychiatry residents?**

- ☐ Definitely Not      ☐ Probably Not      ☐ Possibly      ☐ Probably      ☐ Definitely

**Q35: What barriers will hinder you from contributing to the training and supervision of psychiatry residents? (Select all that apply)**



- ☐ I cannot identify any barriers
- ☐ General lack of interest in training and supervision
- ☐ Lack of adequate training in the area of medical education
- ☐ Lack of adequate financial incentives
- ☐ Lack of protected time for teaching/training
- ☐ Other, please specify:

If you have chosen "other", please specify:

**Q36: What barriers do you perceive will hinder other psychiatrists in your zone from contributing to the training and supervision of psychiatry residents? (Select all that apply)**

- ☐ I cannot identify any barriers
- ☐ General lack of interest in training and supervision
- ☐ Lack of adequate training in the area of medical education
- ☐ Lack of adequate financial incentives
- ☐ Lack of protected time for teaching/training
- ☐ Other, please specify:

If you have chosen "other", please specify:

**Q37: What do you see as the potential benefits of having psychiatry residents train on your service? (Select all that apply)**

- ☐ I cannot identify any benefits
- ☐ Contribution to regular patient care
- ☐ Contribution to on-call
- ☐ Contribution to quality improvement, research, or scholarly work
- ☐ Enrichment of the inter-disciplinary team
- ☐ Increases the profile of the local service
- ☐ Creates opportunities for teaching
- ☐ Creates opportunities for learning by psychiatrists
- ☐ Creates opportunities for learning by members of the interdisciplinary team
- ☐ Creates opportunities for learning by medical students
- ☐ Could help in the long term with recruitment and retention issues locally
- ☐ Other, please specify:

If you have chosen "other", please specify:

**Q38: Would you like to participate in the training and supervision of Canadian-trained psychiatrists undertaking a one-year Dalhousie University accredited fellowship experience in your area of expertise?**

- ☐ Definitely Not    ☐ Probably Not    ☐ Possibly    ☐ Probably    ☐ Definitely

**Q39: Would you like to participate in the training and supervision of fellows undertaking a Royal College-accredited psychiatric subspecialty fellowship including Child and Adolescent Psychiatry and Geriatric Psychiatry?**

- ☐ Definitely Not    ☐ Probably Not    ☐ Possibly    ☐ Probably    ☐ Definitely

**Q40: What barriers will hinder you from receiving Canadian-trained psychiatric fellows on your team? (Select all that apply)**

- ☐ I cannot identify any barriers  
☐ General lack of interest in training and supervision  
☐ Lack of adequate training in the area of medical education  
☐ Lack of adequate financial incentives  
☐ Lack of protected time for teaching/training  
☐ Other, please specify:

If you have chosen "other", please specify:

**Q41: What barriers do you perceive will hinder other psychiatrists in your zone from receiving Canadian-trained psychiatric fellows on their team? (Select all that apply)**

- ☐ I cannot identify any barriers  
☐ General lack of interest in training and supervision  
☐ Lack of adequate training in the area of medical education  
☐ Lack of adequate financial incentives  
☐ Lack of protected time for teaching/training  
☐ Other, please specify:

If you have chosen "other", please specify:

**Q42: Would you like to participate in the training and supervision of internationally trained psychiatrists seeking to undertake the Dalhousie University accredited Fellowships?**

- ☐ Definitely Not    ☐ Probably Not    ☐ Possibly    ☐ Probably    ☐ Definitely

**Q43: What barriers will hinder you from receiving internationally trained psychiatric fellows on your team? (Select all that apply)**

- ☐ I cannot identify any barriers  
☐ General lack of interest in training and supervision  
☐ Lack of adequate training in the area of medical education  
☐ Lack of adequate financial incentives  
☐ Lack of protected time for teaching/training  
☐ Other, please specify:

If you have chosen "other", please specify:

**Q44: What barriers do you perceive will hinder other psychiatrists in your zone from receiving internationally trained psychiatric fellows on their teams? (Select all that apply)**

- ☐ I cannot identify any barriers  
☐ General lack of interest in training and supervision  
☐ Lack of adequate training in the area of medical education  
☐ Lack of adequate financial incentives  
☐ Lack of protected time for teaching/training  
☐ Other, please specify:

If you have chosen "other", please specify:

## CONTINUING PROFESSIONAL DEVELOPMENT

**Q45: How often do you attend the Department of Psychiatry weekly academic grand rounds?**

- ☐ Weekly
- ☐ Monthly
- ☐ Less than Monthly
- ☐ Never

**Q46: Would you like to start or continue attending the Department of Psychiatry weekly academic grand rounds?**

- ☐ Definitely Not
- ☐ Probably Not
- ☐ Possibly
- ☐ Probably
- ☐ Definitely

**Q47: Would you like to present at the Department of Psychiatry weekly academic ground rounds? In addition to selecting a rating below, if you are interested or would like more information about presenting, please reach out to CPD Director, Dr. Cheryl Murphy at [murphyc@dal.ca](mailto:murphyc@dal.ca).**

- ☐ Definitely Not
- ☐ Probably Not
- ☐ Possibly
- ☐ Probably
- ☐ Definitely

**Q48: Have you ever participated in any continuing professional development programs organized by the Department of Psychiatry?**

- ☐ Yes
- ☐ No

**Q49: Would you be interested in participating in future continuing professional development programs organized by the Department of Psychiatry?**

- ☐ Not at all interested
- ☐ Slightly interested
- ☐ Moderately interested
- ☐ Quite interested
- ☐ Extremely interested

## RESEARCH AND KNOWLEDGE TRANSLATION

**Q50: Have you received any formal research training?**

- ☐ Yes
- ☐ No

*Note: if you have NOT answered/chosen item [1] in question 50, skip the following question*

**Q51: What is the highest level of research qualification you have received?**

- ☐ Certificate
- ☐ Diploma
- ☐ Graduate diploma
- ☐ Masters degree
- ☐ PhD
- ☐ Other, please specify:

If you have chosen "other", please specify:

**Q52: Would you be interested in exploring opportunities for formal research training?**

- ☐ Not at all interested
- ☐ Slightly interested
- ☐ Moderately interested
- ☐ Quite interested
- ☐ Extremely interested

**Q53: Have you ever attended the Department of Psychiatry Research Day?**

- ☐ Yes
- ☐ No

**Q54: Would you like to attend the next Department of Psychiatry Research Day on November 3rd, 2023?**

- ☐ Definitely Not
- ☐ Probably Not
- ☐ Possibly
- ☐ Probably
- ☐ Definitely

**Q55: Which mental health or clinical translational research do you currently participate in? (Select all that apply)**

- ☐ I do not participate in any mental health or clinical translational research
- ☐ Addiction research
- ☐ Basic science research
- ☐ Early psychosis research
- ☐ ECT/rTMS/Neuromodulation research
- ☐ Forensic psychiatry research
- ☐ Geriatric psychiatry research
- ☐ Health services research or quality improvement initiatives
- ☐ Medical education research/scholarship
- ☐ Mood disorders research

- ☐ Population mental health/Global mental health
- ☐ Other, please specify:

If you have chosen "other", please specify:

**Q56: Which mental health or clinical translational research would you like to participate in? (Select all that apply)**

- ☐ I would not like to participate in any mental health or clinical translational research
- ☐ Addiction research
- ☐ Basic science research
- ☐ Early psychosis research
- ☐ ECT/rTMS/Neuromodulation research
- ☐ Forensic psychiatry research
- ☐ Geriatric psychiatry research
- ☐ Health services research or quality improvement initiatives
- ☐ Medical education research/scholarship
- ☐ Mood disorders research
- ☐ Population mental health/Global mental health
- ☐ Other, please specify:

If you have chosen "other", please specify:

**Q57: What barriers will hinder you from participating in mental health or clinical translational research? (Select all that apply)**

- ☐ I cannot identify any barriers
- ☐ General lack of interest in research
- ☐ Lack of adequate training in research methods
- ☐ Lack of adequate financial incentives
- ☐ Lack of protected time for research
- ☐ Other, please specify:

If you have chosen "other", please specify:

**Q58: What barriers do you perceive will hinder other psychiatrists in your zone from participating in mental health or clinical translational research? (Select all that apply)**

- ☐ I cannot identify any barriers
- ☐ General lack of interest in research
- ☐ Lack of adequate training in research methods
- ☐ Lack of adequate financial incentives
- ☐ Lack of protected time for research
- ☐ Other, please specify:

If you have chosen "other", please specify:

**Q59: What are the benefits of psychiatrists participating in mental health or clinical translational research? (Select all that apply)**

- ☐ I cannot identify any benefits
- ☐ Could improve quality of patient care
- ☐ Contribution to knowledge translation
- ☐ Enrichment of the inter-disciplinary team collaboration
- ☐ Increases the profile of the local service
- ☐ Creates opportunities for knowledge translation
- ☐ Creates opportunities for learning by psychiatrists
- ☐ Creates opportunities for learning by members of the interdisciplinary team
- ☐ Could help in the long term with recruitment and retention issues locally
- ☐ Other, please specify:

If you have chosen "other", please specify:

**Q60: Have you published (lead, or co-author) in a peer-reviewed journal in the last 2 years?**

- ☐ Yes
- ☐ No

**Q61: Would you like to publish (lead, or co-author) in a peer-reviewed journal in the future?**

- ☐ Definitely Not    ☐ Probably Not    ☐ Possibly    ☐ Probably    ☐ Definitely

**Q62: Do you have access to a research assistant in your service?**

- ☐ Yes  
☐ No

*Note: if you have NOT answered/chosen item [2] in question 62, skip the following question*

**Q63: Would you like to have access to a research assistant in your service?**

- ☐ Definitely Not    ☐ Probably Not    ☐ Possibly    ☐ Probably    ☐ Definitely

## STUDY PARTICIPATION

**Q64: Would you be interested in participating in a focused group discussion to delve deeper into some of the items on this survey?**

- ☐ Yes  
☐ No

**Q65: Would you be interested in being informed about the results of this survey?**

- ☐ Yes  
☐ No
